# Supplementary figures and images for: Synergetic Effect of Tumor Treating Fields and Zinc Oxide Nanoparticles on Cell Apoptosis and Genotoxicity of Three Different Human Cancer Cell Lines
Source: MDPI journal article supplement (doi:10.3390/molecules27144384), 2022-07-08

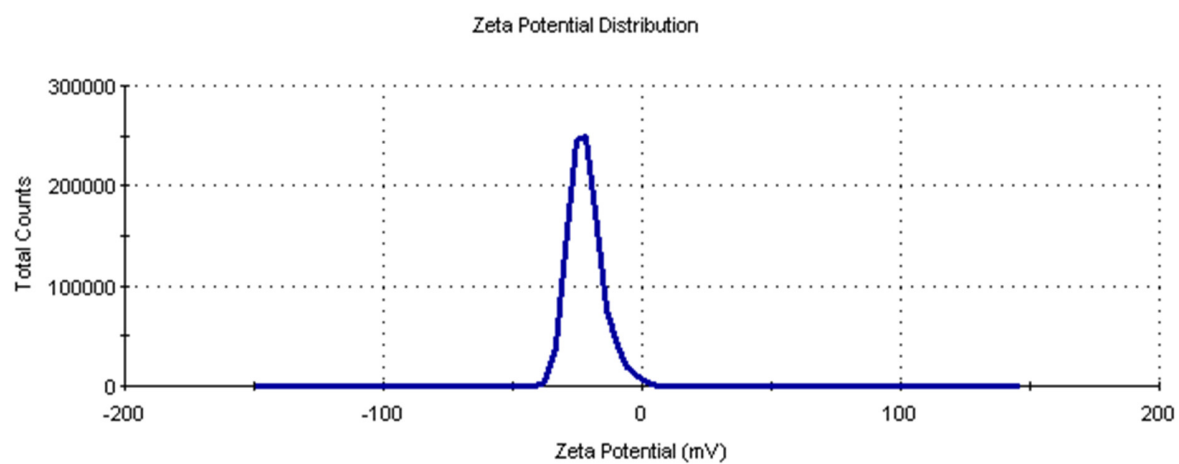

Figure S1. Zeta potential distribution of ZnO NPs.

Supplement: s1 [file s1]
